# Supplementary material for: CCL2/CCL5 secreted by the stroma induce IL-6/PYK2 dependent chemoresistance in ovarian cancer
Source: Springer Nature journal article supplement (doi:10.1186/s12943-018-0787-z), 2018-02-15
Supplement: MOESM1 [file 15474732]

# Supplementary figure 1

**A**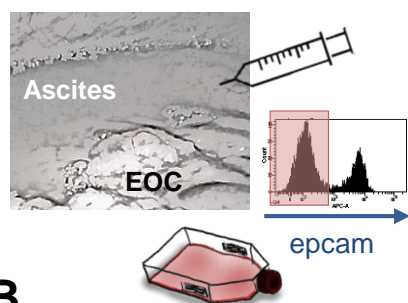**C**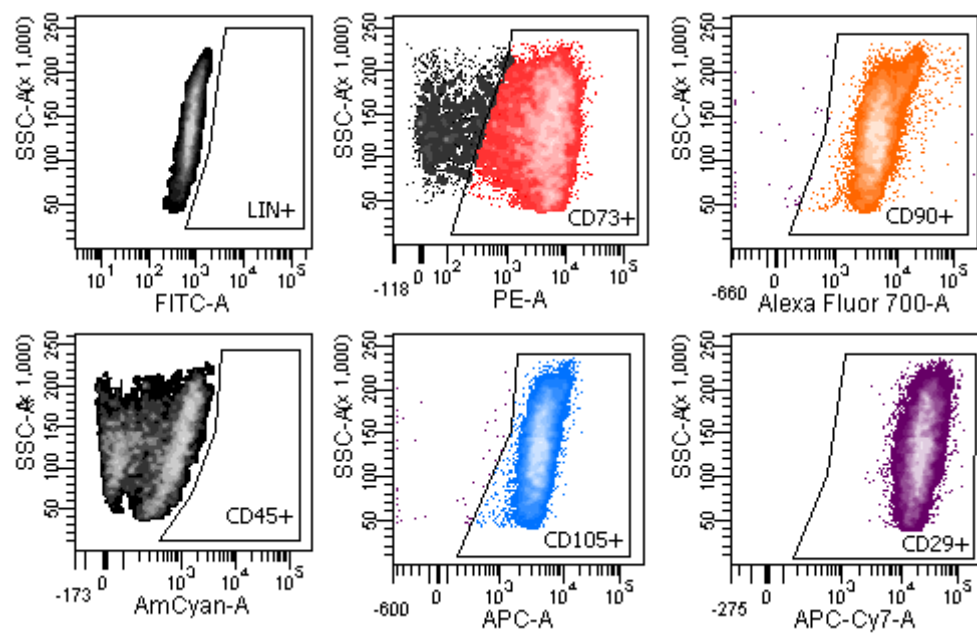**D**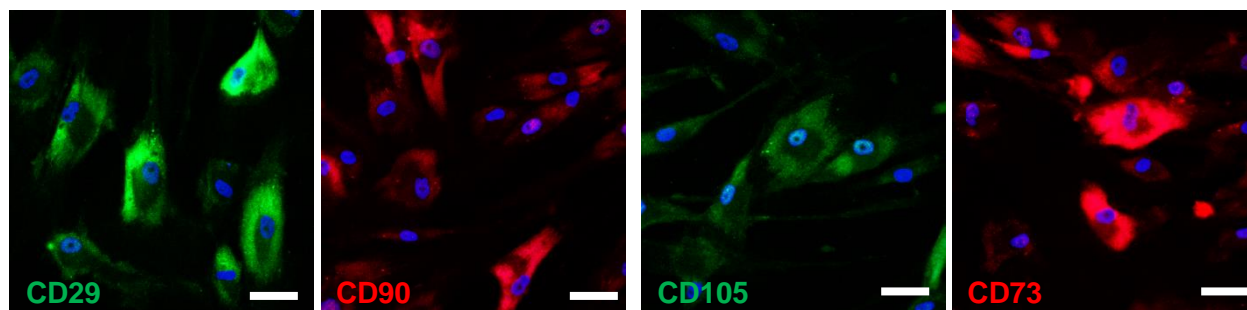

## Supplementary figure 2

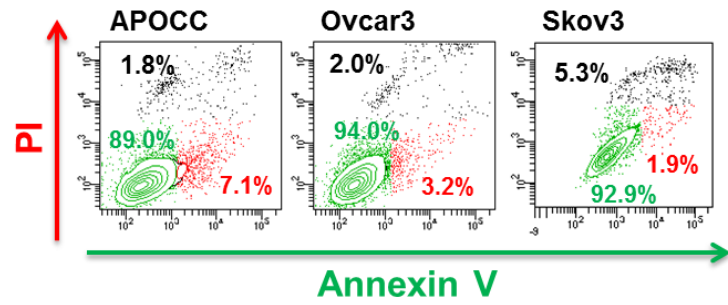

## Supplementary figure 3

A

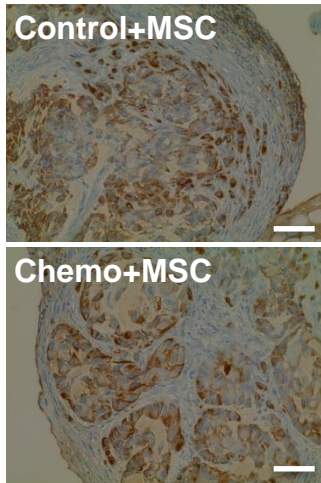

B

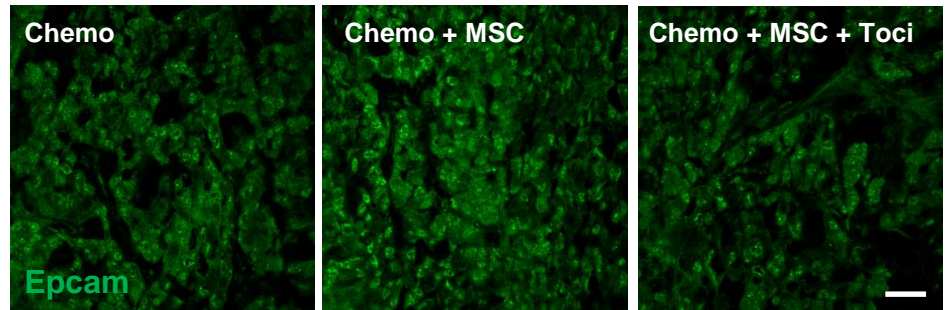

# Supplementary figure 4

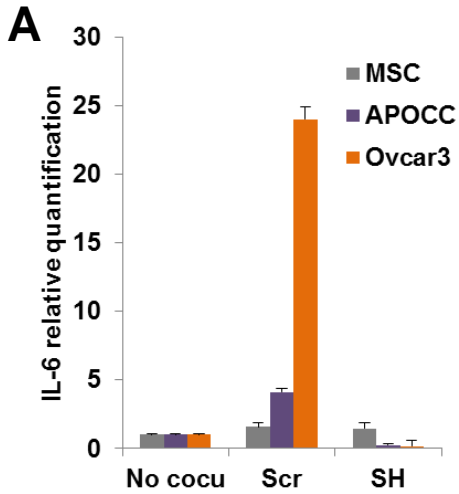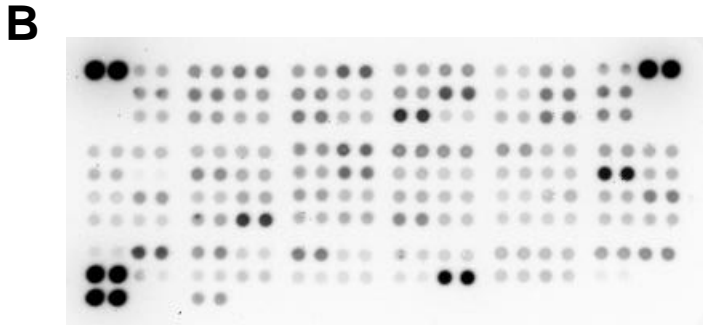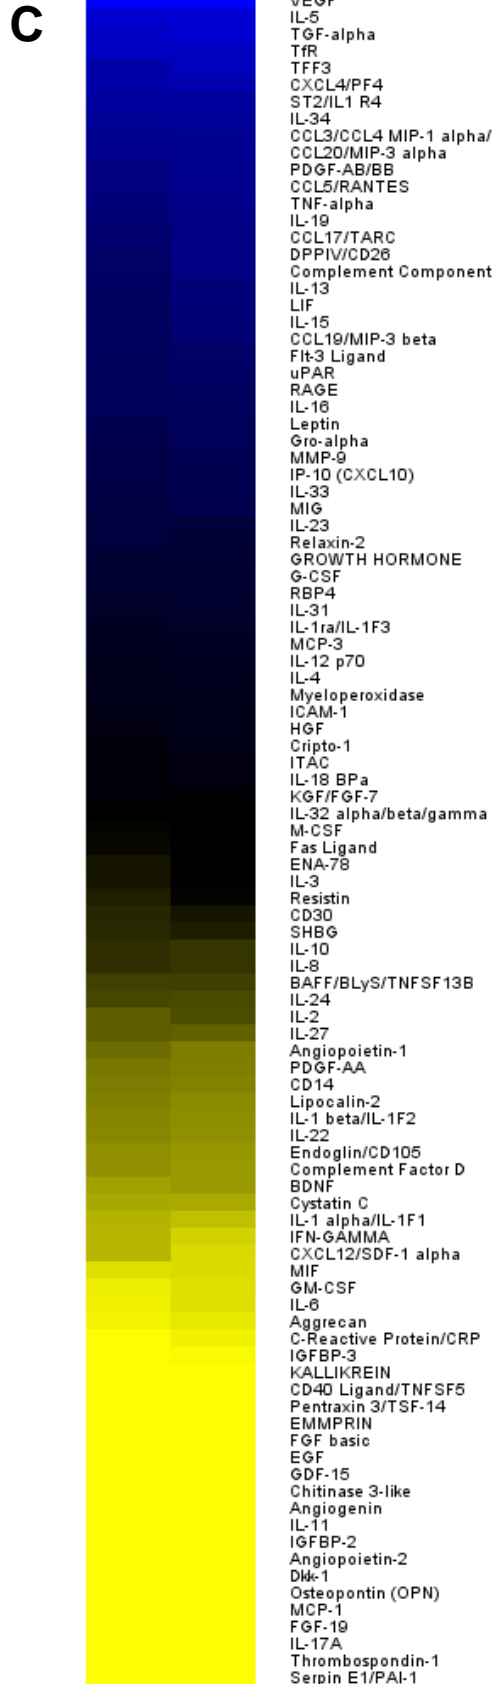

# Supplementary figure 5

**APOCC**

**Chemotherapy**

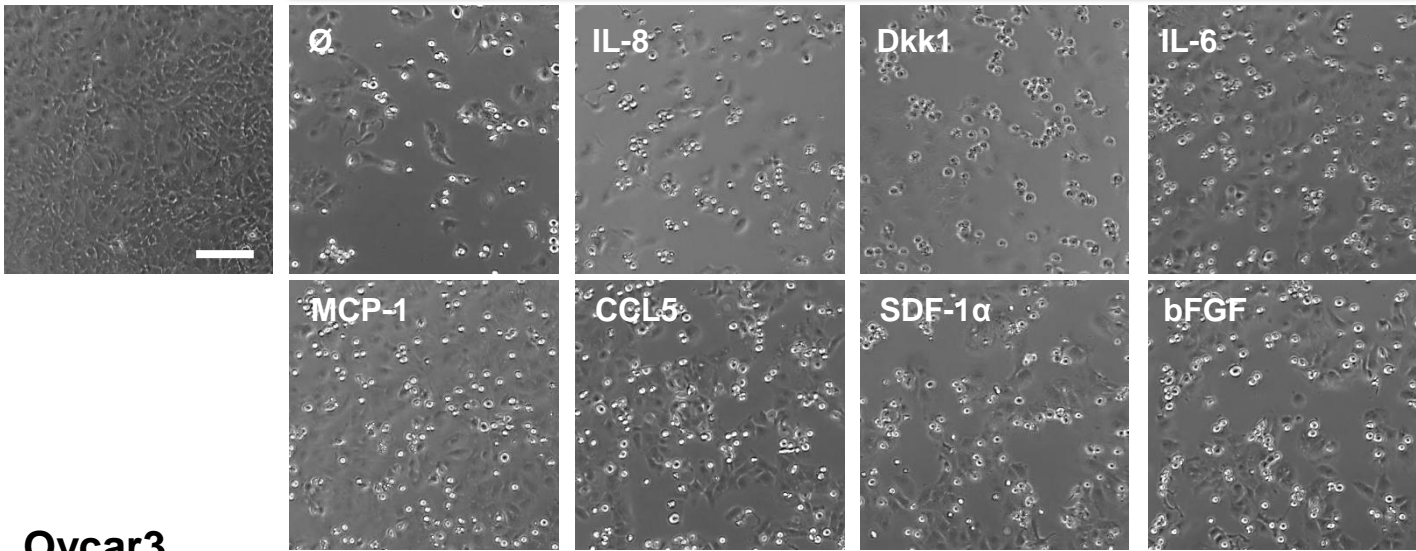

**Ovcar3**

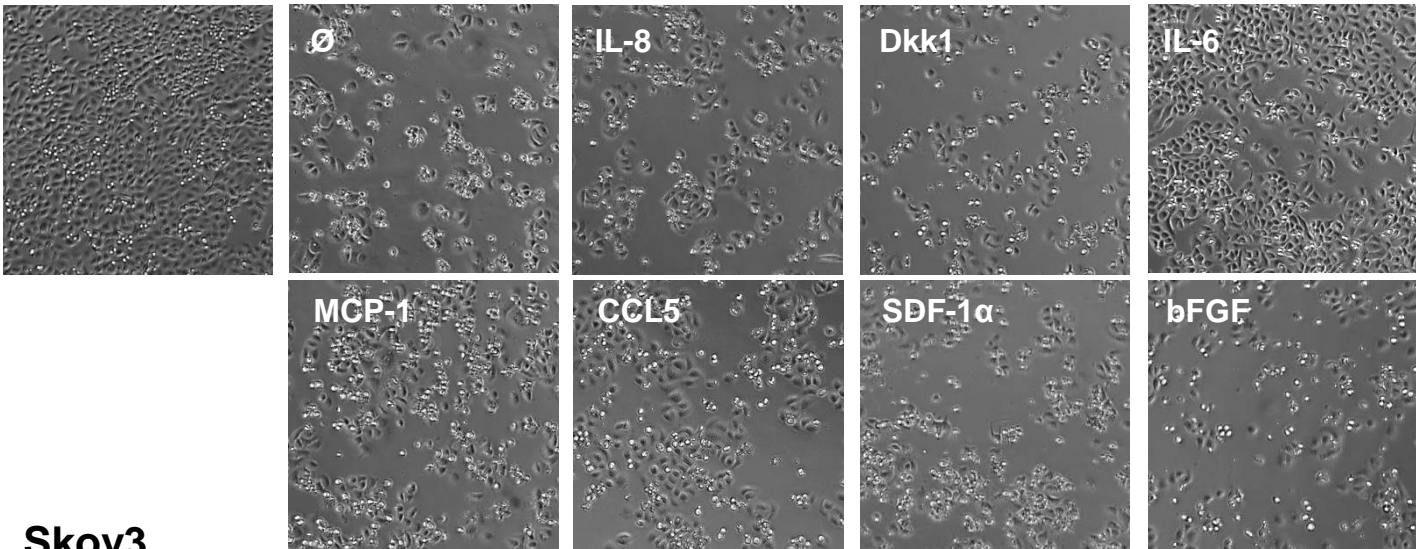

**Skov3**

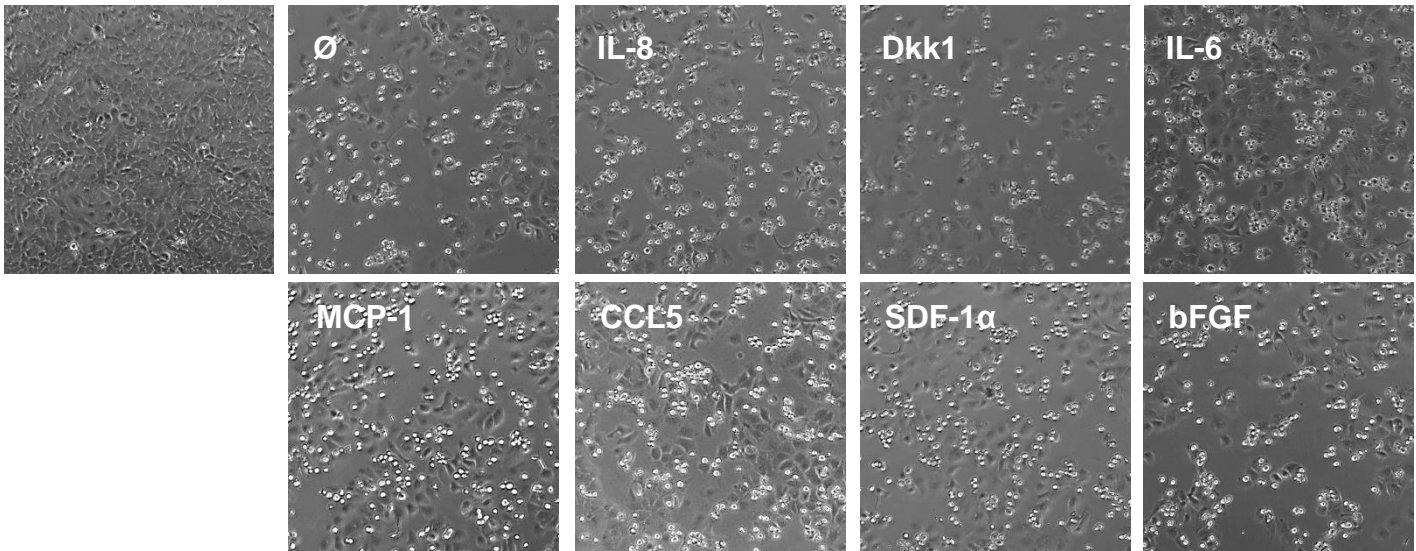

# Supplementary figure 6

**A**

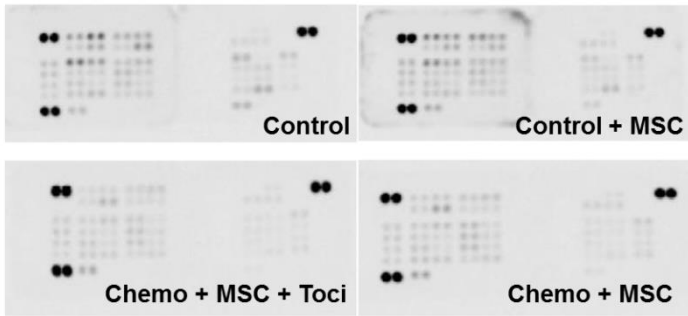

**B**

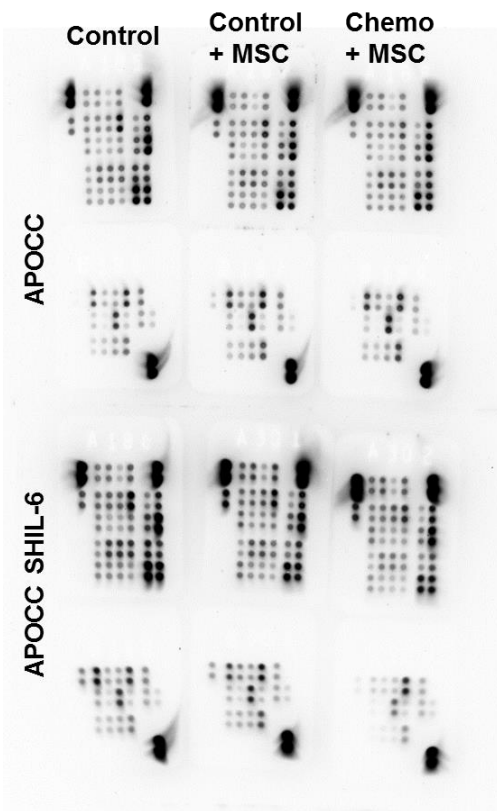

**C**

|                  | APOCC<br>MSC | APOCC<br>MSC chemo | APOCC SH<br>MSC | APOCC SH<br>MSC chemo |
|------------------|--------------|--------------------|-----------------|-----------------------|
| Akt 1/2/3 (S473) | 2.12         | 1.86               | 0.74            | 0.59                  |
| HSP27            | 1.20         | 1.19               | 0.80            | 0.64                  |
| p70 S6 Kinase    | 1.32         | 1.25               | 1.06            | 1.05                  |
| c-Jun            | 1.43         | 1.54               | 1.35            | 0.64                  |
| p70 S6 Kinase    | 1.33         | 1.01               | 0.94            | 0.50                  |
| RSK 1/2/3        | 1.40         | 1.47               | 0.93            | 0.56                  |
| Fyn              | 1.26         | 1.34               | 1.29            | 1.22                  |
| Fgr              | 1.28         | 1.11               | 1.03            | 0.96                  |
| STAT5b           | 1.28         | 1.09               | 0.78            | 0.48                  |
| STAT3 (Y705)     | 2.03         | 1.92               | 1.28            | 0.29                  |
| p27              | 1.31         | 1.06               | 1.09            | 0.19                  |
| PLC-γ1           | 1.49         | 1.30               | 1.43            | 0.18                  |
| Hck              | 1.29         | 1.33               | 1.26            | 1.25                  |
| Chk-2            | 1.26         | 1.12               | 0.90            | 0.78                  |
| FAK              | 1.45         | 0.97               | 1.18            | 1.05                  |
| PDGF Rβ          | 1.30         | 1.21               | 0.81            | 0.53                  |
| STAT5a/b         | 1.32         | 1.20               | 1.21            | 0.68                  |
| STAT3 (S727)     | 1.57         | 1.50               | 0.63            | 0.08                  |
| WNK1             | 2.09         | 1.53               | 0.66            | 0.04                  |
| PYK2             | 8.89         | 2.36               | 1.12            | 0.05                  |
| HSP60            | 11.34        | 4.28               | 0.64            | 0.04                  |
